# Supplementary material
Source: publisher figshare collection journal article supplement (https://sage.figshare.com/ndownloader/files/21943734)
Supplement: Supplementary file 1 [file 21943734]

## Sheet: Sheet1
Table S3: The motif distribution of TNL subfamily in domains
	Domain	TIR				NBS							LRR
	Motif	T-1	T-2	T-3	T-4	P-loop	Kinase-2/RNAB-B	RNBS-C	GLPL	RNBS-D	TNBS-1	TNBS-2	L-1	L-2	L-3	L-4	L-5	L-6	L-7	L-8	L-9
	Motif Number	Motif01	Motif03	Motif02	Motif08	Motif04	Motif05	Motif09	Motif12	Motif20	Motif13	Motif18	Motif07	Motif10	Motif17	Motif14	Motif06	Motif15	Motif16	Motif19	Motif11
TNL	Sopim05g006620.0.1	1	1	1	1	1	1	1	1	1	1	1	1	1	0	1	1	1	1	0	0
	Sopim01g102880.0.1	1	1	1	1	1	1	1	1	1	1	1	1	1	0	1	1	1	1	0	0
	Sopim01g113620.0.1	1	1	1	1	1	1	1	1	1	1	1	1	1	0	1	1	1	1	0	0
	Sopim09g092410.0.1	0	1	1	1	1	1	1	1	1	1	0	1	1	0	1	1	1	1	0	0
	Sopim01g014840.0.1	1	1	1	1	1	1	1	1	1	1	1	1	1	1	1	1	1	1	1	0
	Sopim07g052770.0.1	1	1	1	1	1	1	1	1	1	1	0	1	1	1	1	1	1	1	0	0
	Sopim02g082050.0.1	1	1	1	1	1	1	1	1	1	1	1	1	1	0	1	1	1	1	0	0
	Sopim04g056570.0.1	1	1	1	1	1	1	1	1	1	1	0	1	1	1	1	1	1	1	0	1
	Sopim11g011080.0.1	1	1	1	1	1	1	1	1	1	1	1	1	1	1	1	1	1	1	1	1
	Sopim01g008800.0.1	1	1	1	1	1	1	1	1	1	1	1	1	1	1	1	1	1	1	1	0
	Sopim11g011090.0.1	1	1	1	1	1	1	1	1	1	1	1	1	1	1	1	1	1	1	1	1
	Sopim05g007850.0.1	1	1	1	1	1	1	1	1	1	1	1	1	1	1	1	1	1	1	1	1
	Sopim08g005510.0.1	1	1	1	1	1	1	1	1	1	1	1	1	1	0	1	1	1	1	0	1
	Sopim11g011350.0.1	1	1	1	1	1	1	1	1	1	1	1	1	1	0	1	1	1	1	1	1
1 menns exist, "0 "means not exist
